# Supplementary material
Source: PubMed Central journal article supplement (PMC2875157)
Supplement: NIHMS29104-supplement-1.pdf [file NIHMS29104-supplement-1.pdf]

**Supplementary Material For:**

**eIF5 is a GDP dissociation inhibitor necessary for translational control by eIF2 phosphorylation**

Martin D. Jennings and Graham D. Pavitt

*Faculty of Life Sciences, University of Manchester, Michael Smith Building, Oxford Road, Manchester M13 9PT, United Kingdom*

Correspondence and requests for materials should be addressed to [graham.pavitt@manchester.ac.uk](mailto:graham.pavitt@manchester.ac.uk).

This supplementary material file includes three tables, six figures and associated additional references.

|                                                          |                  |
|----------------------------------------------------------|------------------|
| <b>Table S1 Plasmids used in this study.....</b>         | <b>Page S2</b>   |
| <b>Table S2 Oligonucleotides used in this study.....</b> | <b>Page S3</b>   |
| <b>Table S3 Yeast Strains used in this study.....</b>    | <b>Page S4-5</b> |
| <b>Figure S1.....</b>                                    | <b>Page S6</b>   |
| <b>Figure S2.....</b>                                    | <b>Page S6</b>   |
| <b>Figure S3.....</b>                                    | <b>Page S7</b>   |
| <b>Figure S4.....</b>                                    | <b>Page S8</b>   |
| <b>Figure S5.....</b>                                    | <b>Page S9</b>   |
| <b>Figure S6.....</b>                                    | <b>Page S10</b>  |
| <b>Supplementary additional References.....</b>          | <b>Page S11</b>  |

**Table S1. Plasmids used in this study**

| Name                                  | Description                                                             | Construction <sup>a</sup> / Reference                                                                                                                                                    |
|---------------------------------------|-------------------------------------------------------------------------|------------------------------------------------------------------------------------------------------------------------------------------------------------------------------------------|
| pRS316                                | CEN6 <i>URA3</i>                                                        | Ref <sup>30</sup>                                                                                                                                                                        |
| p722                                  | pRS316 CEN6 <i>URA3 GCN2</i>                                            | Ref <sup>22</sup>                                                                                                                                                                        |
| p1055                                 | pRS316 CEN6 <i>URA3 GCN2-M788V,E1591K</i>                               | Ref <sup>22</sup>                                                                                                                                                                        |
| p1056                                 | pRS316 CEN6 <i>URA3 GCN2-E601K,E1591K</i>                               | Ref <sup>22</sup>                                                                                                                                                                        |
| pGEX-4T-1                             | IPTG inducible GST fusion vector                                        | GE Healthcare                                                                                                                                                                            |
| YEplac181 2μ <i>TIF5-FLAG LEU2</i>    |                                                                         | Ref <sup>16</sup>                                                                                                                                                                        |
| pGEX-TIF5                             | pGEX-4T-1 <i>GST-TIF5</i>                                               | Ref <sup>28</sup>                                                                                                                                                                        |
| pAV1915                               | pGEX-4T-1 <i>GST-TIF5 (R15M)</i>                                        | Site-directed mutagenesis of pGEX-TIF5 using oligonucleotides eIF5(R15M)1 and eIF5(R15M)2                                                                                                |
| pAV1919                               | pGEX-4T-1 <i>GST-TIF5 (W391F)</i>                                       | Site-directed mutagenesis of pGEX-TIF5 using oligos eIF5(W391F)1 and eIF5(W391F)2                                                                                                        |
| pAV1936                               | YEplac181 2μ <i>TIF5-FLAG (W391F) LEU2</i>                              | Site-directed mutagenesis of YEplac181 2μ <i>TIF5-FLAG (W391F) LEU2</i> using oligos eIF5(W391F)1 and eIF5(W391F)2                                                                       |
| pAV1937                               | YEplac181 2μ <i>TIF5-FLAG (R15M) LEU2</i>                               | Site-directed mutagenesis of YEplac181 2μ <i>TIF5-FLAG (R15M) LEU2</i> using oligos eIF5(R15M)1 and eIF5(R15M)2                                                                          |
| YEplac181 2μ <i>TIF5-FLAG-7A LEU2</i> |                                                                         | Ref <sup>16</sup>                                                                                                                                                                        |
| pAV2010                               | pGEX-4T-1 <i>GST-TIF5-NTD</i>                                           | PCR amplification of 1-456bp of TIF5 from pGEX-TIF5 using oligos TIF5ntdF and TIF5-152R to include 5' BamHI and 3' XhoI sites, then inserted in pGEX-4T-1                                |
| pAV2011                               | pGEX-4T-1 <i>GST-TIF5-NTD+LR</i>                                        | PCR amplification of 1- 720bp of TIF5 from pGEX-TIF5 using oligos TIF5ntdF and TIF5-240R to include 5' BamHI and 3' XhoI site, then inserted in pGEX-4T-1                                |
| pAV2012                               | pGEX-4T-1 <i>GST-TIF5-CTD</i>                                           | PCR amplification of 721-1215bp of TIF5 from pGEX-TIF5 using oligos TIF5ctdF2 and TIF5ctdR to include 5' BamHI and 3' XhoI site, then inserted in pGEX-4T-1                              |
| pAV2013                               | pGEX-4T-1 <i>GST-TIF5-LR+CTD</i>                                        | PCR amplification of 457-1215bp of TIF5 from pGEX-TIF5 using oligos TIF5-153F and TIF5ctdR to include 5' BamHI and 3' XhoI site, then inserted in pGEX-4T-1                              |
| pAV1043                               | <i>6His-GCD11</i> in pALTER-1                                           | Ref <sup>13,31</sup>                                                                                                                                                                     |
| pAV2021                               | <i>3Myc-6His-GCD11</i> pALTER-1                                         | Annealing of complementary oligos MYCtagF and MYCtagR and ligation into BspE1 site of pAV1043                                                                                            |
| pAV2034                               | pRS424 2μ <i>3Myc-6His-GCD11 TRP1</i>                                   | NheI-EcoRI fragment from pAV2021 cloned into EcoRI-SpeI of pRS424                                                                                                                        |
| pAV2052                               | pRS314 CEN6 <i>3Myc-6His-GCD11 TRP1</i>                                 | NheI-EcoRI fragment from pAV2021 cloned into EcoRI-SpeI of pRS314                                                                                                                        |
| pAV2053                               | YCplac111 <i>CEN4 TIF5-FLAG (R15M) LEU2</i>                             | EcoRI-HinDIII fragment from pAV1937 cloned into YCplac111                                                                                                                                |
| pAV2054                               | YCplac111 <i>CEN4 TIF5-FLAG LEU2</i>                                    | EcoRI-HinDIII fragment from YEplac181 2μ <i>TIF5-FLAG LEU2</i> cloned into YCplac111                                                                                                     |
| pAV2055                               | YCplac111 <i>CEN4 TIF5-FLAG (W391F) LEU2</i>                            | EcoRI-HinDIII fragment from pAV1936 cloned into YCplac111                                                                                                                                |
| pAV2091                               | Fragment of <i>TIF5</i> (BsmI-KpnI) with LR7A mutation in vector pMA-AP | Custom synthesis by Mr.Gene GmbH of <i>TIF5</i> (540-1098bp) with the following mutations introduced (D220A, D221A, W223A, D226A, E230A, R235A, E238A). A BsmI-KpnI fragment.            |
| pAV2093                               | pGEX-4T-1 <i>GST-TIF5-LR7A</i>                                          | Replacement of BsmI-KpnI region of pGEX-TIF5 with BsmI-KpnI region of pAV2091                                                                                                            |
| pAV2100                               | YEplac181 2μ <i>TIF5-FLAG (LR7A) LEU2</i>                               | PCR using oligos TIF5FLAGF and TIF5FLAGR and pAV2093 as a template adding NdeI at 5' and FLAG tag and Sall at 3'. Then used to replace NdeI-Sall of YEplac181 2μ <i>TIF5-FLAG LEU2</i> . |
| pAV2101                               | YCplac111 <i>CEN4 TIF5-FLAG (LR7A) LEU2</i>                             | PCR using oligos TIF5FLAGF and TIF5FLAGR and pAV2093 as a template adding NdeI at 5' and FLAG tag and Sall at 3'. Then used to replace NdeI-Sall of pAV2054.                             |

<sup>a</sup>All constructed for this study unless referenced

**Table S2. Oligonucleotides used in this study**

| <b>Name</b>  | <b>Sequence (5'-3')</b>                                    |
|--------------|------------------------------------------------------------|
| MYCtagF      | CCGGAGAACAATAATTGATTTCTGAAGAAGATTTGA                       |
| MYCtagR      | CCGGTCAAATCTTCTTCAGAAATCAATTTTTGTTCT                       |
| eIF5(R15M)1  | GAGGCATTTTGTACATGTAAAAATGGATCATGATTATC                     |
| eIF5(R15M)2  | GATCCATTTTACATGTACAAAAATGCCTCCCATCCAAG                     |
| eIF5(W391F)1 | GCGGTTTCTAAGAACGTAATGAATGGCTTAGCAGCCC                      |
| eIF5(W391F)2 | GCCATTCATTACGTTCTTAGAAAACCGCTGAAAGTGACG                    |
| TIF5FLAGF    | GCGTGGCATATGTCTATTAATATTTGTAGAGATAATC                      |
| TIF5FLAGR    | GTCGTCGACCTATTTGTTCATCGTCGTCCTTGTAGTCTTCGTCGTCCTTCTTCATCAT |
| TIF5ctdF2    | AGATGCGGATCCGTGAACCTCTGAGCTCACTCA                          |
| TIF5ctdR     | ATCGATCTCGAGTCACTATTTCGTCGTCCTTCTTCATCAT                   |
| TIF5ntdF     | GGTCGCGGATCCATGTCTATTAATATTTGTAGAG                         |
| TIF5-152R    | ATCGATCTCGAGTCACTACTTGGAACCAGAAACGGAGTC                    |
| TIF5-240R    | ATCGATCTCGAGTCACTATTCTAGTTCCTTGGCACGAGC                    |
| TIF5-153F    | GGTCGCGGATCCAAGAAGAAGAAAGCAGCTACC                          |

**Table S3. Yeast Strains used in this study**

| Name   | Genotype                                                                                                          | Construction/ reference                                                                                                    |
|--------|-------------------------------------------------------------------------------------------------------------------|----------------------------------------------------------------------------------------------------------------------------|
| KAY24  | <i>MATa leu2-3 leu2-112 gcn2Δ tif5Δ trp1Δ63 ura3-52</i> <pKA235 [ <i>TIF5 CEN URA3</i> ]>                         | Ref <sup>16</sup>                                                                                                          |
| GP3511 | <i>MATα gcn2Δ ino1 leu2-3 leu2-112 pep4::LEU2 sui2Δ ura3-52 (HIS4-lacZ)</i> <pAV1089 [2μ his6-eIF2 <i>URA3</i> ]> | Ref <sup>13,31</sup>                                                                                                       |
| GP4597 | <i>MATα trp1Δ63 ura3-52 leu2-3 leu2-112 GAL2+ gcn2Δ pep4::hisG</i>                                                | Ref <sup>32</sup>                                                                                                          |
| GP5012 | <i>MATα gcd11::hisG leu2-3 leu2-112 trp1Δ::hisG ura3-52 (HIS4-lacZ)</i> Ep517 [ <i>LEU2 CEN GCD11</i> ]           | <i>This study</i> , <i>trp1Δ</i> in EY551, from E. Hannig see ref <sup>33</sup>                                            |
| GP5134 | KAY24 + pAV1937 [ <i>TIF5-R15M LEU2</i> 2μ]                                                                       | <i>This study</i> , Transformation of KAY24 with pAV1937                                                                   |
| GP5137 | KAY24 + pAV1948 [ <i>TIF5-R15M LEU2 CEN</i> ]                                                                     | <i>This study</i> , Transformation of KAY24 with pAV1948                                                                   |
| GP5423 | GP4597 + YEpTIF5-FL-7A [2μ <i>TIF5-7A-FLAG LEU2</i> ]                                                             | <i>This study</i> , Transformation of GP4597 with YEpTIF5-FL-7A                                                            |
| GP5424 | GP4597 + YEpTIF5-FL [2μ <i>TIF5-FLAG LEU2</i> ]                                                                   | <i>This study</i> , Transformation of GP4597 with YEpTIF5-FL                                                               |
| GP5463 | GP5012 + pAV2052 [ <i>3myc-6His-GCD11 TRP1 CEN</i> ]                                                              | <i>This study</i> , Transformation of GP5012 with pAV2052                                                                  |
| GP5627 | KAY24 + YEpTIF5-FL [ <i>TIF5-FLAG LEU2</i> 2μ] pAV1198 [ <i>CEN6 URA3 GCN2</i> ]                                  | <i>This study</i> , Transformation of KAY24 with YEpTIF5-FL, plasmid shuffle to lose pKA235 then transformation of pAV1198 |
| GP5628 | KAY24 + pAV1936 [ <i>TIF5-W391F-FLAG LEU2</i> 2μ] pAV1198 [ <i>CEN6 URA3 GCN2</i> ]                               | <i>This study</i> , Transformation of KAY24 with pAV1936, plasmid shuffle to lose pKA235 then transformation of pAV1198    |
| GP5631 | KAY24 + pAV2054 [ <i>TIF5-FLAG LEU2 CEN</i> ] pAV1198 [ <i>CEN6 URA3 GCN2</i> ]                                   | <i>This study</i> , Transformation of KAY24 with pAV2054, plasmid shuffle to lose pKA235 then transformation of pAV1198    |
| GP5632 | KAY24 + pAV2055 [ <i>TIF5-W391F-FLAG LEU2 CEN</i> ] pAV1198 [ <i>CEN6 URA3 GCN2</i> ]                             | <i>This study</i> , Transformation of KAY24 with pAV2055, plasmid shuffle to lose pKA235 then transformation of pAV1198    |
| GP5633 | KAY24 + pAV2100 [ <i>TIF5-LR7A LEU2</i> 2μ] pAV1198 [ <i>CEN6 URA3 GCN2</i> ]                                     | <i>This study</i> , Transformation of KAY24 with pAV2100, plasmid shuffle to lose pKA235 then transformation of pAV1198    |
| GP5634 | KAY24 + pAV2101 [ <i>TIF5-LR7A LEU2 CEN</i> ] pAV1198 [ <i>CEN6 URA3 GCN2</i> ]                                   | <i>This study</i> , Transformation of KAY24 with pAV2101, plasmid shuffle to lose pKA235 then transformation of pAV1198    |
| GP5637 | KAY24 + pAV2054 [ <i>TIF5-FLAG LEU2 CEN</i> ] pRS316 [ <i>CEN6 URA3</i> ]                                         | <i>This study</i> , Transformation of KAY24 with pAV2054, plasmid shuffle to lose pKA235 then transformation of pRS316     |
| GP5638 | KAY24 + pAV2055 [ <i>TIF5-W391F-FLAG LEU2 CEN</i> ] pRS316 [ <i>CEN6 URA3</i> ]                                   | <i>This study</i> , Transformation of KAY24 with pAV2055, plasmid shuffle to lose pKA235 then transformation of pRS316     |
| GP5639 | KAY24 + pAV2101 [ <i>TIF5-LR7A LEU2 CEN</i> ] pRS316 [ <i>CEN6 URA3</i> ]                                         | <i>This study</i> , Transformation of KAY24 with pAV2101, plasmid shuffle to lose pKA235 then transformation of pRS316     |
| GP5640 | KAY24 + YEpTIF5-FL [ <i>TIF5-FLAG LEU2</i> 2μ] pRS316 [ <i>CEN6 URA3</i> ]                                        | <i>This study</i> , Transformation of KAY24 with YEpTIF5-FL, plasmid shuffle to lose pKA235 then transformation of pRS316  |
| GP5641 | KAY24 + pAV1936 [ <i>TIF5-W391F-FLAG LEU2</i> 2μ] pRS316 [ <i>CEN6 URA3</i> ]                                     | <i>This study</i> , Transformation of KAY24 with pAV1936, plasmid shuffle to lose pKA235 then transformation of pRS316     |
| GP5642 | KAY24 + pAV2100 [ <i>TIF5-LR7A LEU2</i> 2μ] pRS316 [ <i>CEN6 URA3</i> ]                                           | <i>This study</i> , Transformation of KAY24 with pAV2100, plasmid shuffle to lose pKA235 then transformation of pRS316     |
| GP5661 | GP5012 + pAV2034 [ <i>3c-Myc-6His-GCD11 TRP1</i> 2μ]                                                              | <i>This study</i> , Transformation of GP5012 with pAV2034                                                                  |

*Continued over*

| <b>Name</b> | <b>Genotype</b>                                                                                                  | <b>Construction/ reference</b>                                                                                                        |
|-------------|------------------------------------------------------------------------------------------------------------------|---------------------------------------------------------------------------------------------------------------------------------------|
| GP5842      | KAY24 + YE <sub>p</sub> TIF5-FL [ <i>TIF5-FLAG LEU2</i> 2 $\mu$ ] p1056 [ <i>GCN2<sup>c</sup>-516 URA3 CEN</i> ] | <i>This study</i> , Transformation of KAY24 with YE <sub>p</sub> TIF5-FL, plasmid shuffle to lose pKA235 then transformation of p1056 |
| GP5843      | KAY24 + pAV1936 [ <i>TIF5-W391F-FLAG LEU2</i> 2 $\mu$ ] p1056 [ <i>GCN2<sup>c</sup>-516 URA3 CEN</i> ]           | <i>This study</i> , Transformation of KAY24 with pAV1936, plasmid shuffle to lose pKA235 then transformation of p1056                 |
| GP5844      | KAY24 + pAV2054 [ <i>TIF5-FLAG LEU2 CEN</i> ] p1056 [ <i>GCN2<sup>c</sup>-516 URA3 CEN</i> ]                     | <i>This study</i> , Transformation of KAY24 with pAV2054, plasmid shuffle to lose pKA235 then transformation of p1056                 |
| GP5845      | KAY24 + pAV2055 [ <i>TIF5-W391F-FLAG LEU2 CEN</i> ] p1056 [ <i>GCN2<sup>c</sup>-516 URA3 CEN</i> ]               | <i>This study</i> , Transformation of KAY24 with pAV2055, plasmid shuffle to lose pKA235 then transformation of p1056                 |
| GP5863      | KAY24 + YE <sub>p</sub> TIF5-FL [ <i>TIF5-FLAG LEU2</i> 2 $\mu$ ] p1055 [ <i>GCN2<sup>c</sup>-513 URA3 CEN</i> ] | <i>This study</i> , Transformation of KAY24 with YE <sub>p</sub> TIF5-FL, plasmid shuffle to lose pKA235 then transformation of p1055 |
| GP5864      | KAY24 + pAV1936 [ <i>TIF5-W391F-FLAG LEU2</i> 2 $\mu$ ] p1055 [ <i>GCN2<sup>c</sup>-513 URA3 CEN</i> ]           | <i>This study</i> , Transformation of KAY24 with pAV1936, plasmid shuffle to lose pKA235 then transformation of p1055                 |
| GP5865      | KAY24 + pAV2054 [ <i>TIF5-FLAG LEU2 CEN</i> ] p1055 [ <i>GCN2<sup>c</sup>-515 URA3 CEN</i> ]                     | <i>This study</i> , Transformation of KAY24 with pAV2054, plasmid shuffle to lose pKA235 then transformation of p1055                 |
| GP5866      | KAY24 + pAV2055 [ <i>TIF5-W391F-FLAG LEU2 CEN</i> ] p1055 [ <i>GCN2<sup>c</sup>-515 URA3 CEN</i> ]               | <i>This study</i> , Transformation of KAY24 with pAV2055, plasmid shuffle to lose pKA235 then transformation of p1055                 |

## Supplementary Figures

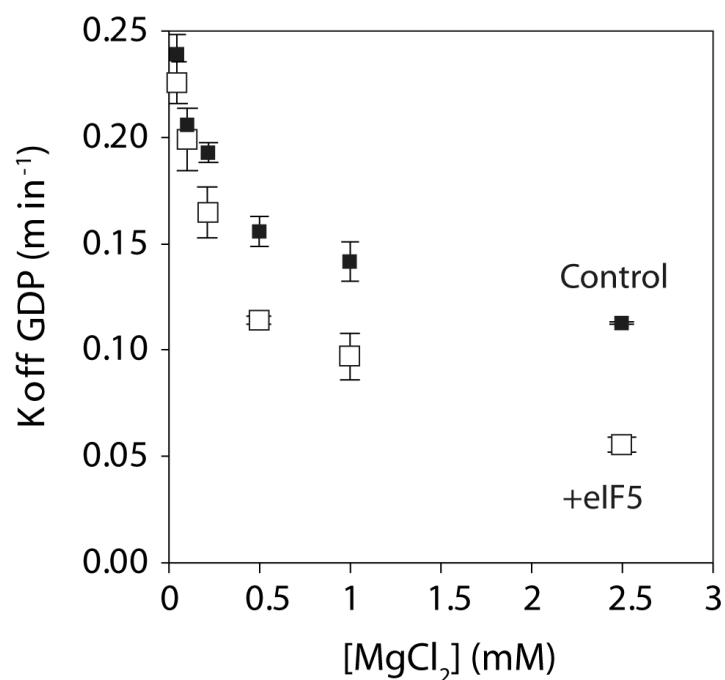

**Figure S1: eIF5 GDI activity functions over a range of MgCl<sub>2</sub> concentrations.** Affect of MgCl<sub>2</sub> concentration on GDP release (K<sub>off</sub> GDP) from eIF2 (60 pmol, filled squares) alone or eIF2 (60 pmol) + eIF5 (120 pmol; open squares).

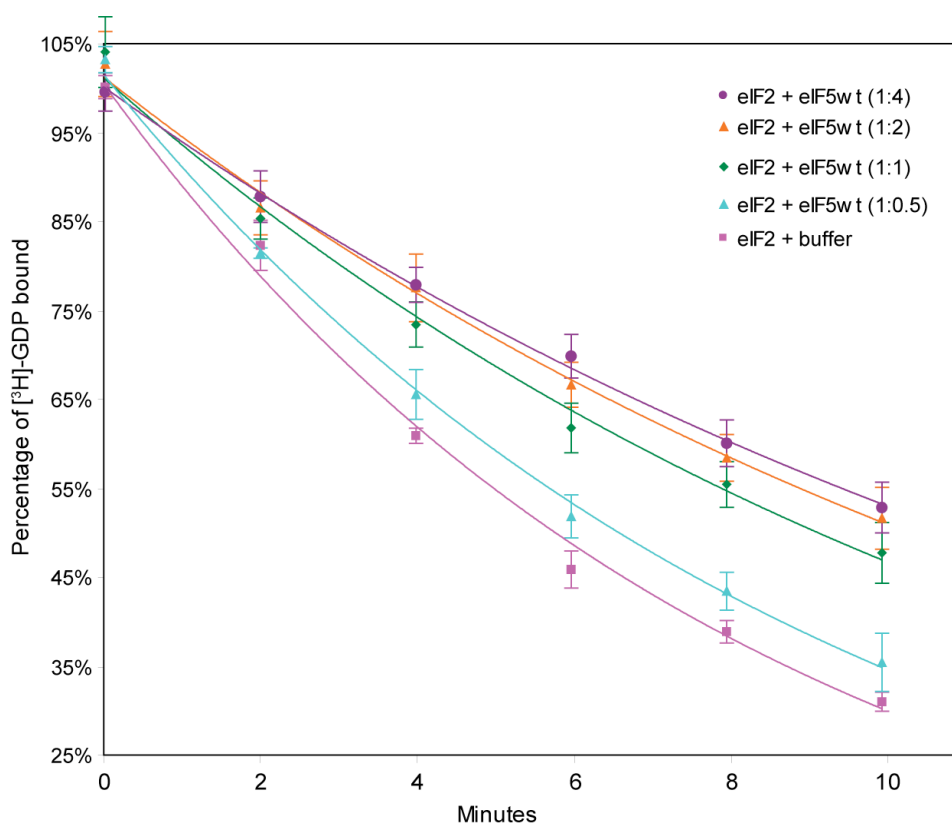

**Figure S2: Example eIF2-[<sup>3</sup>H]-GDP dissociation assay data.** [<sup>3</sup>H]-GDP dissociation from eIF2 (60 pmol) with either buffer or increasing amounts of GST-eIF5. data used to calculate K<sub>off</sub> GDP values shown in Fig.1b. The molar eIF2:GST-eIF5 ratio is indicated.

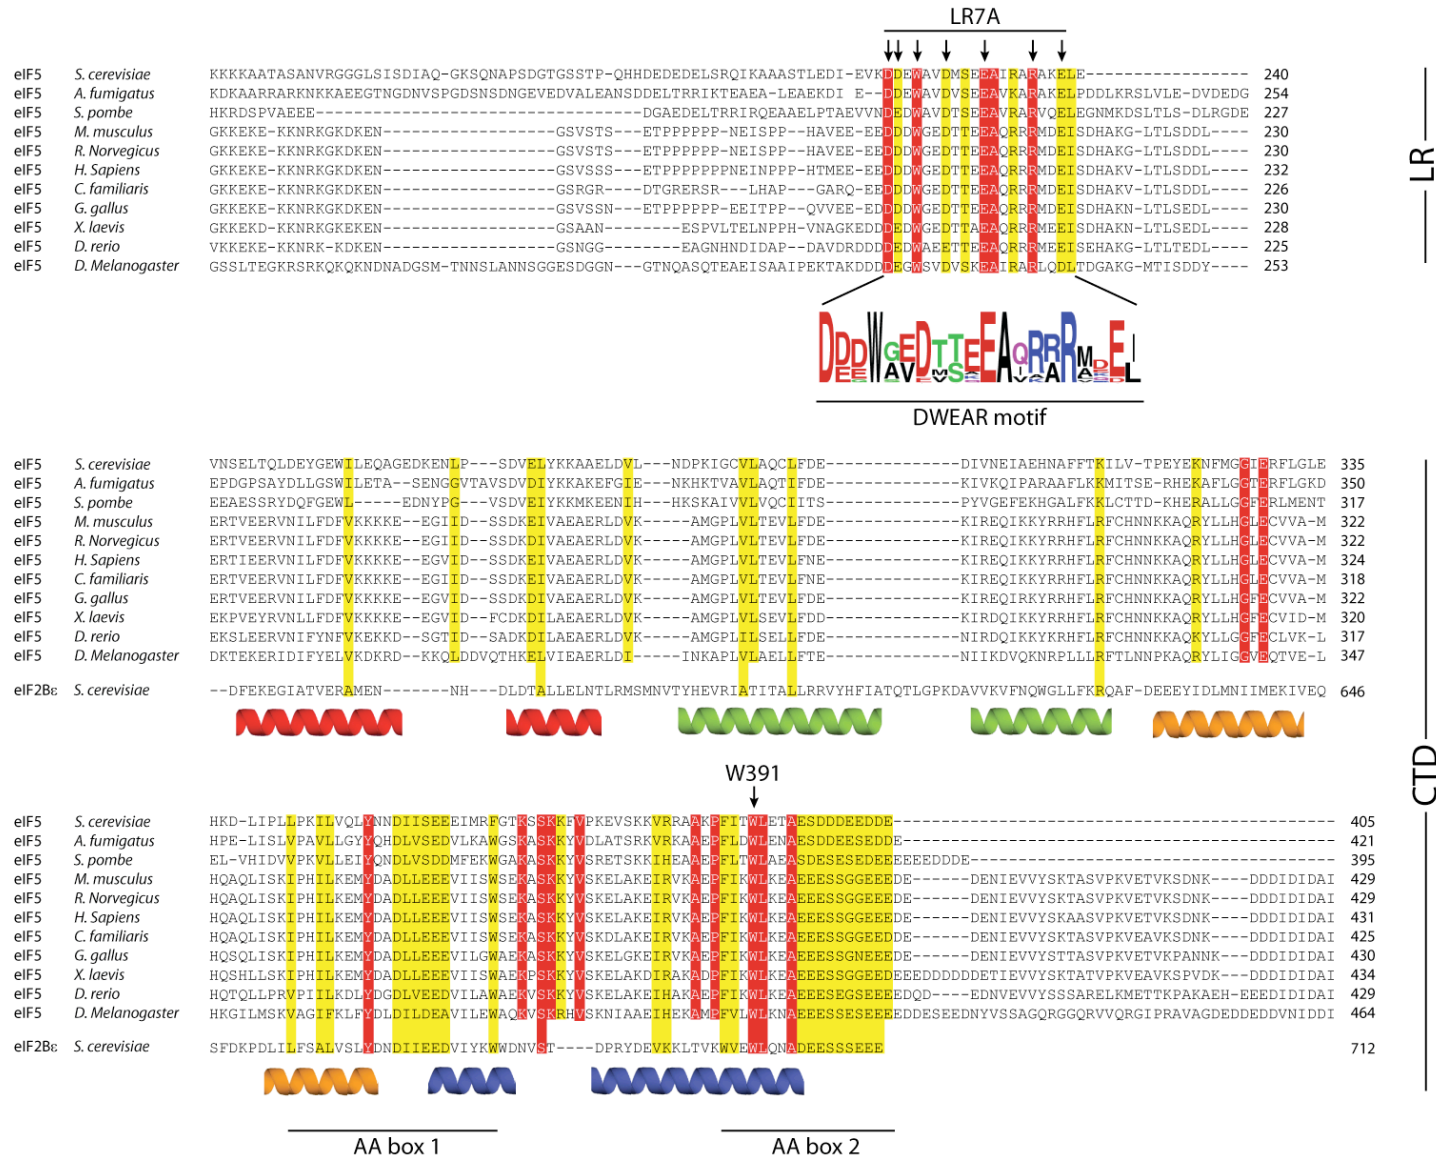

**Figure S3: Multiple sequence alignment of eIF5 LR+CTD.** Yeast eIF5-CTD, Human eIF5-CTD and yeast eIF2Bε-CTD were aligned structurally using DALI<sup>34</sup> then aligned to the other species using Clustal W<sup>35</sup>. Identical residues are highlighted in red and functionally similar residues are highlighted in yellow. The conserved DWEAR motif is shown using WebLogo<sup>36</sup> and the positions of the W391 and LR7A mutations are indicated, as are the previously defined AA box 1 and 2 motifs<sup>15</sup> important for eIF5 function.

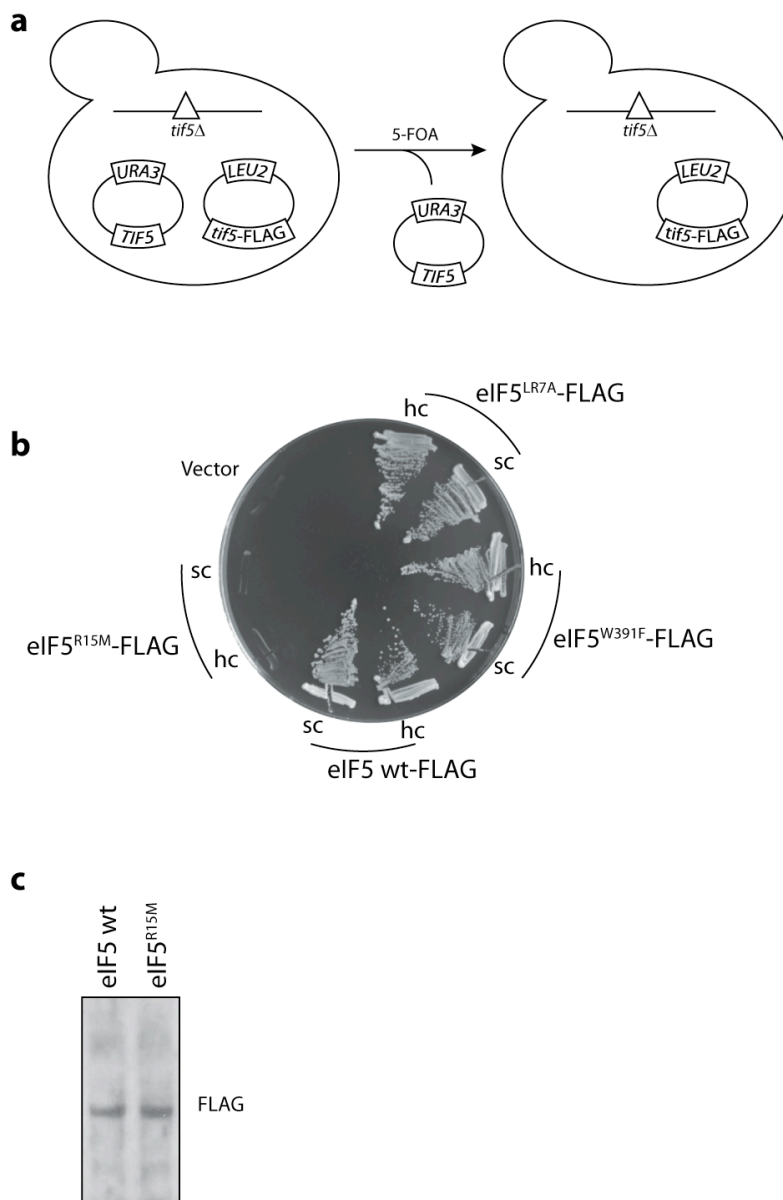

**Figure S4: GAP activity is the essential function of eIF5.** **a**) Cartoon depicting 5-FOA plasmid shuffling strategy in a *tif5* $\Delta$  (eIF5 deletion) strain. **b**) Growth of *tif5*-FLAG mutants on 5-FOA selective medium. **c**) Anti-FLAG immunoblot shows sc eIF5<sup>R15M</sup> is expressed equivalent to wild-type (wt).



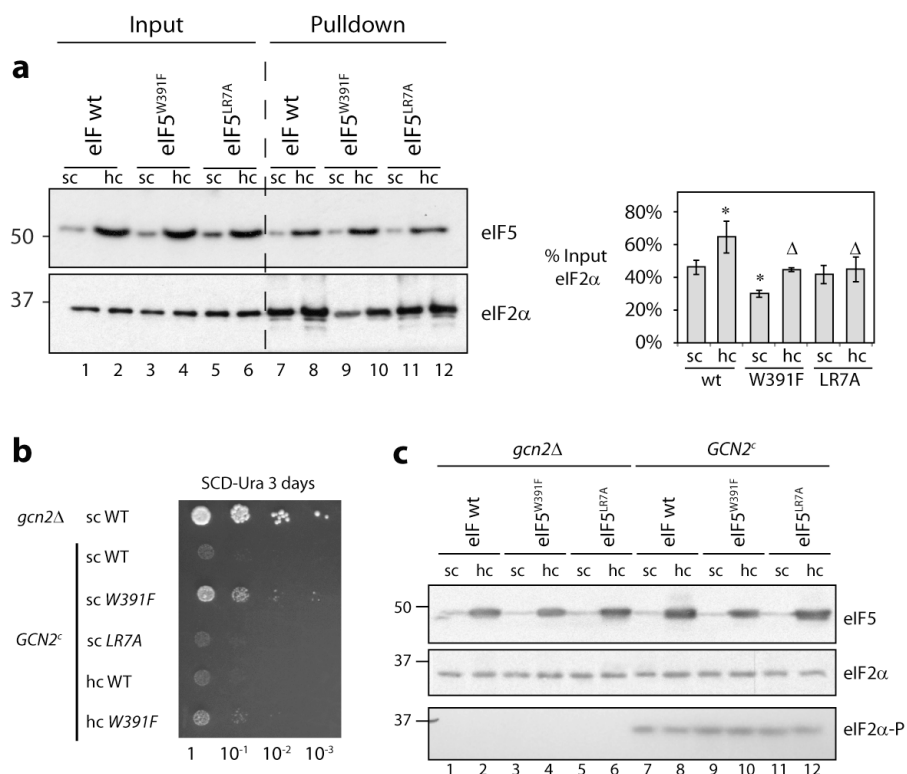

**Figure S5: eIF5 W391F affects the global response to eIF2α phosphorylation.** **a**) Left: Inputs (10 %, lanes 1-6) and co-immune precipitates of eIF2 with FLAG-eIF5 and immunoblotting with specific antibodies as indicated from cells bearing indicated sc and hc alleles of eIF5 (lane 7-12). Right: Densitometry, percentage input eIF2 in complex with eIF5 ±SD (n=3). Significant difference to wildtype (wt) sc (\*) or hc (Δ) (p<0.05, unpaired Student's *t*-test). **b**) Yeast strains expressing indicated allele of eIF5 from either sc or hc plasmids as sole source of eIF5 were transformed with the severe constitutively active *GCN2<sup>c</sup>-516* plasmid (p1056, *GCN2-E601K,E1591K*) and grown on selective medium. **c**) Whole cell protein extracts (10 μg) prepared from the indicated strains were subject to SDS-PAGE and immunoblotting with indicated specific antibodies.

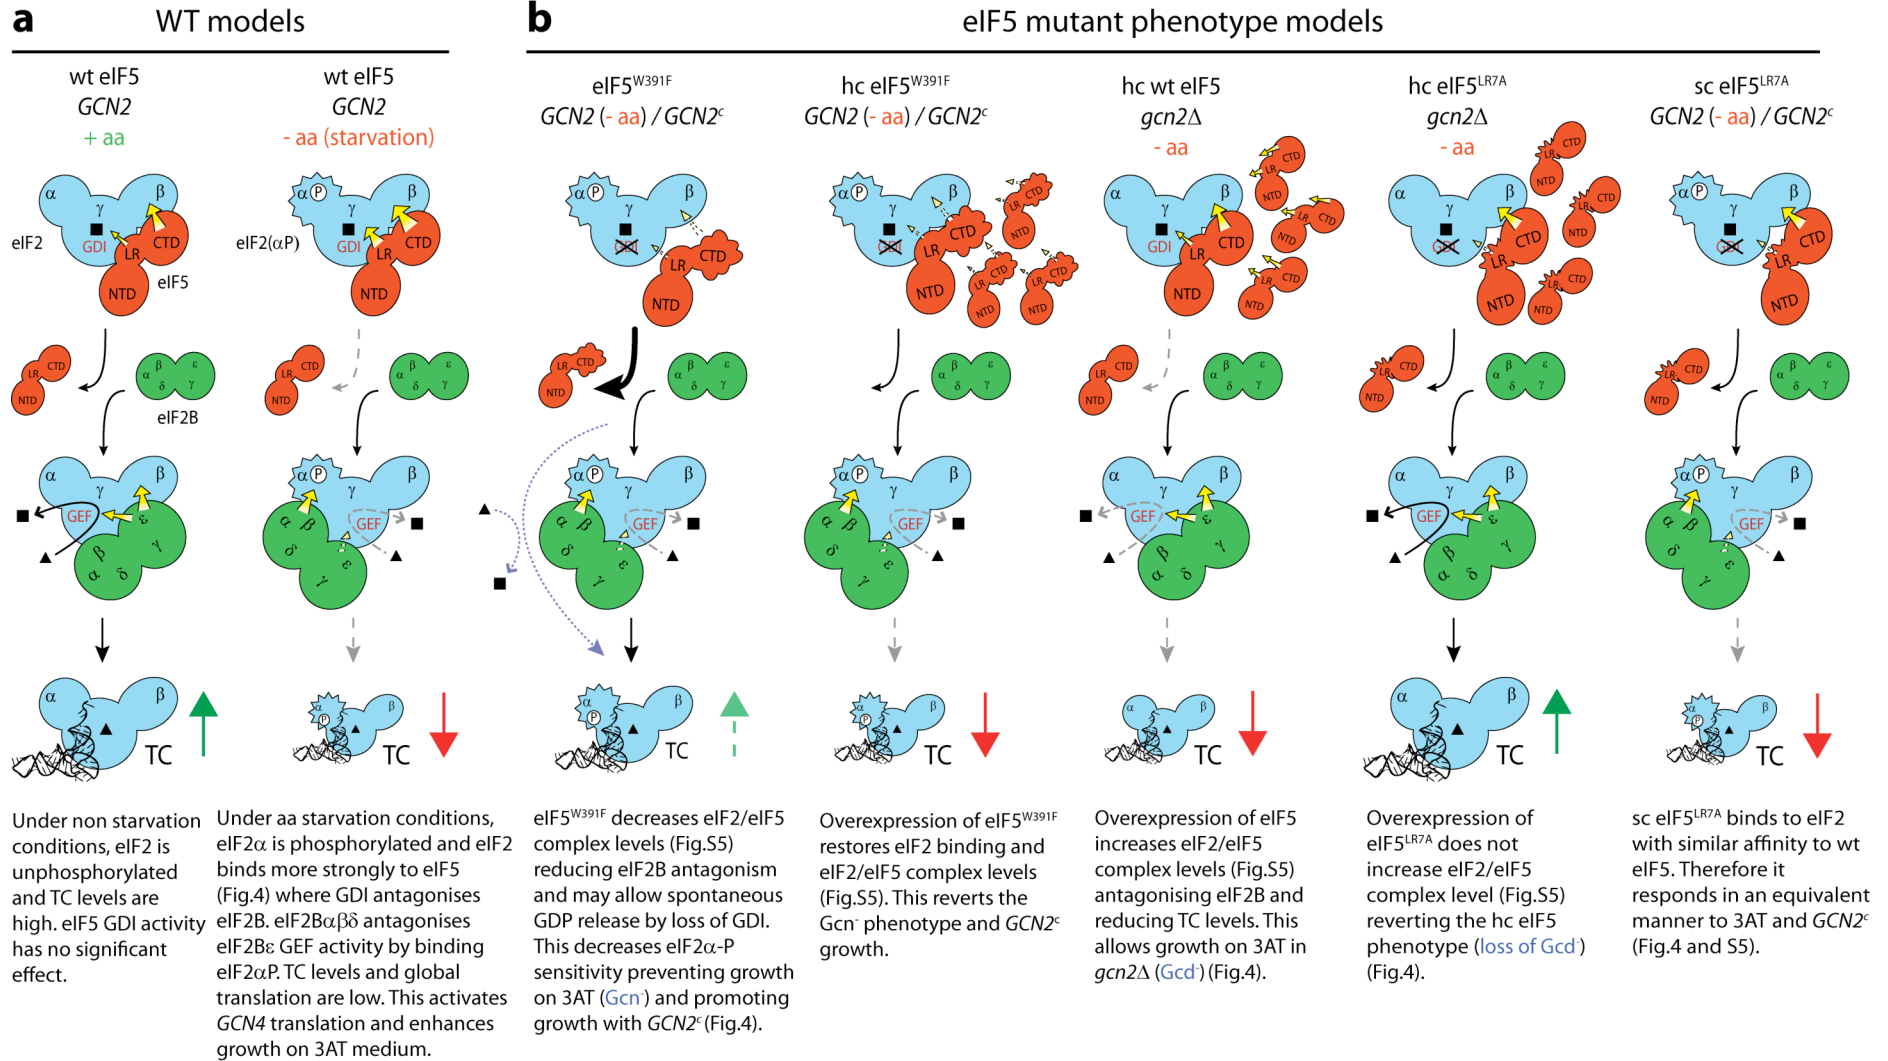

**Figure S6: Models.** Cartoons to explain domain interactions between eIF5 and eIF2 to mediate GDI activity and to account for phenotypes in Figs 4 and S5. **a)** a more detailed cartoon model than shown in Fig.4e for eIF5 GDI activity, nucleotide exchange and its inhibition by phosphorylated eIF2 $\alpha$  showing presumptive domain interactions between factors. Here the three eIF5 domains delineated in the text are shown and their interactions with eIF2 subunits indicated by yellow arrows (the larger the arrow the tighter the binding). Solid black and dashed grey arrows show active and restricted reactions respectively,  $\blacktriangle$  GTP,  $\blacksquare$  GDP. Green and red arrows indicate increased and reduced ternary complex (TC) **b)** changes to the wildtype interactions and reactions caused by W391F, LR7A mutations and overexpression. Altered domain shapes and diminished yellow arrows indicate the proposed altered interactions. Possible route for spontaneous nucleotide release indicated for W391F (by dotted blue arrow) is inferred from enhanced eIF2 $\cdot$ GDP off-rate (Fig.1) and previous work showing that eIF2B independent nucleotide exchange is possible when TC is overexpressed<sup>37,31</sup>.

## Supplementary Additional References

- 30 Sikorski, R. S. & Hieter, P. A system of shuttle vectors and yeast host strains designed for efficient manipulation of DNA in *Saccharomyces cerevisiae*. *Genetics* **122**, 19-27 (1989).
- 31 Gomez, E., Mohammad, S. S. & Pavitt, G. D. Characterization of the minimal catalytic domain within eIF2B: the guanine-nucleotide exchange factor for translation initiation. *EMBO J.* **21**, 5292-5301. (2002).
- 32 Mohammad-Qureshi, S. S. *et al.* Purification of FLAG-tagged eukaryotic initiation factor 2B complexes, subcomplexes, and fragments from *Saccharomyces cerevisiae*. *Methods Enzymol.* **431**, 1-13 (2007).
- 33 Dorris, D. R., Erickson, F. L. & Hannig, E. M. Mutations in *GCD11*, the structural gene for eIF-2 gamma in yeast, alter translational regulation of *GCN4* and the selection of the start site for protein synthesis. *EMBO J.* **14**, 2239-2249 (1995).
- 34 Holm, L., Kaariainen, S., Rosenstrom, P. & Schenkel, A. Searching protein structure databases with DaliLite v.3. *Bioinformatics* **24**, 2780-2781 (2008).
- 35 Thompson, J. D., Gibson, T. J., Plewniak, F., Jeanmougin, F. & Higgins, D. G. The CLUSTAL\_X windows interface: flexible strategies for multiple sequence alignment aided by quality analysis tools. *Nucleic Acids Res.* **25**, 4876-4882 (1997).
- 36 Crooks, G. E., Hon, G., Chandonia, J. M., and Brenner, S. E., WebLogo: a sequence logo generator. *Genome Res.* **14**, 1188 (2004).
- 37 Erickson, F. L., Nika, J., Rippel, S., and Hannig, E. M., Minimum requirements for the function of eukaryotic translation initiation factor 2. *Genetics* **158**, 123 (2001).
